# Supplementary material for: Termination of non-coding transcription in yeast relies on both a CTD-interaction domain and a CTD-mimic in Sen1
Source: bioRxiv or medRxiv preprint supplement (doi:10.1101/433045), 2020-01-03
Supplement: Supplementary file [file media-1.pdf]

## **Termination of non-coding transcription in yeast relies on both a CTD-interaction domain and a CTD-mimic in Sen1**

Han, Z; Jasnovidova, O; Tudek, A.; Kubicek, K; Libri, D; Stefl, R and O. Porrua.

### **List of supplementary material:**

- Supplementary figure 1.
- Tables S1, S2, S8, S9, S10 and S11.
- Supplementary references.

### **Material provided as separate files:**

- Table S3: quantification of termination defects at snoRNAs in *sen1 $\Delta$ Nter* and *sen1 $\Delta$ Nter $\Delta$ NIM* mutants.
- Table S4: protein-coding genes upregulated in *sen $\Delta$ Nter* relative to the wt.
- Table S5: protein-coding genes upregulated in *sen1 $\Delta$ Nter $\Delta$ NIM* relative to the wt.
- Table S6: protein-coding genes downregulated in *sen $\Delta$ Nter* relative to the wt.
- Table S7: protein-coding genes downregulated in *sen1 $\Delta$ Nter $\Delta$ NIM* relative to the wt.

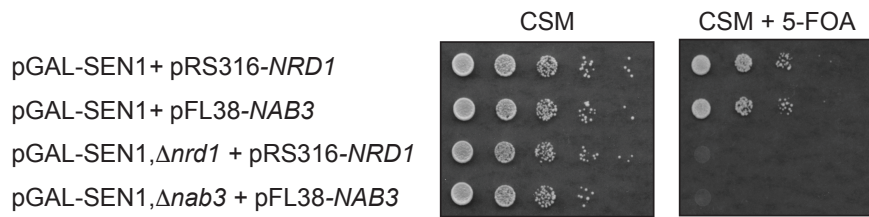

**Supplementary figure 1: Overexpression of Sen1 does not bypass the requirement of Nrd1 and Nab3 for cell viability.** Cells expressing *SEN1* from pGAL in a wt context or combined with deletions of *NRD1* or *NAB3* covered by *URA3*-centromeric plasmids harbouring the respective *NRD1* or *NAB3* alleles were grown in CSM in the presence of galactose to induce overexpression of *SEN1*. Then, cells were plated on CSM containing galactose in the absence or in the presence of 5-FOA to monitor the capacity of cells to lose the *URA3* plasmids. The absence of growth of  $\Delta nrd1$  and  $\Delta nab3$  cells on 5-FOA plates implies that these genes are still essential even when *SEN1* is overexpressed.

**Table S1:** Equilibrium binding of Nrd1 CID to Sen1 and Trf4 NIMs monitored by fluorescence anisotropy.

|              | <b>Sen1 NIM</b> | <b>Trf4 NIM</b> |
|--------------|-----------------|-----------------|
|              | Kd ( $\mu$ M)   | Kd ( $\mu$ M)   |
| <b>wt</b>    | 1.2 $\pm$ 0.02  | 0.9 $\pm$ 0.02  |
| <b>L20D</b>  | 16.9 $\pm$ 1.5  | 13.4 $\pm$ 1.2  |
| <b>K21D</b>  | 8.0 $\pm$ 0.8   | 6.1 $\pm$ 0.4   |
| <b>S25D</b>  | 76.1 $\pm$ 14.2 | 53.9 $\pm$ 8.2  |
| <b>R28D</b>  | 78.2 $\pm$ 11.5 | 63.4 $\pm$ 4.0  |
| <b>I130A</b> | 7.6 $\pm$ 0.3   | 4.5 $\pm$ 0.2   |
| <b>I130K</b> | 36.7 $\pm$ 4.6  | 14.1 $\pm$ 1.2  |
| <b>I130N</b> | 8.9 $\pm$ 0.5   | 6.1 $\pm$ 0.3   |
| <b>M126A</b> | 1.4 $\pm$ 0.07  | 1.1 $\pm$ 0.02  |
| <b>R133A</b> | 1.8 $\pm$ 0.08  | 1.4 $\pm$ 0.02  |
| <b>R133D</b> | 2.0 $\pm$ 0.1   | 1.2 $\pm$ 0.05  |
| <b>R133G</b> | 1.6 $\pm$ 0.04  | 1.3 $\pm$ 0.04  |

**Table S2: NMR and refinement statistics for the Nrd1 CID–Sen1 NIM complex**

| Nrd1 CID-Sen1 NIM complex                           |                  |
|-----------------------------------------------------|------------------|
| <b>NMR distance &amp; dihedral constraints</b>      |                  |
| Distance restraints                                 |                  |
| Total NOEs                                          | 2499             |
| Intra-residue                                       | 654              |
| Inter-residue                                       | 1845             |
| Short                                               | 1273             |
| Medium                                              | 645              |
| Long                                                | 581              |
| Hydrogen bonds                                      | 100              |
| Intermolecular distance restraints                  | 65               |
| Total dihedral angle restraints <sup>a</sup>        | 222              |
| <b>Structure statistics<sup>b</sup></b>             |                  |
| Violations (mean and s.d.)                          |                  |
| Number of distance restraint violations > 0.5 Å     | 0.05 ± 0.22      |
| Number of dihedral angle restraint violations > 15° | 1.1 ± 1.2        |
| Max. dihedral angle restraint violation (°)         | 29.03 ± 27.63    |
| Max. distance constraint violation (Å)              | 0.027 ± 0.12     |
| Deviations from idealized geometry <sup>b</sup>     |                  |
| Bond lengths (Å)                                    | 0.0037 ± 0.00008 |
| Bond angles (°)                                     | 1.673 ± 0.013    |
| Average pairwise r.m.s.d (Å) <sup>b</sup>           |                  |
| Nrd1 CID (6-82,91-135,143-147,149-153)              |                  |
| Heavy atoms                                         | 1.1              |
| Backbone atoms                                      | 0.7              |
| Sen1 NIM (2052-2063)                                |                  |
| Heavy atoms                                         | 1.9              |
| Backbone atoms                                      | 1.3              |
| Complex                                             |                  |
| All complex heavy atoms                             | 2.5              |
| All complex backbone atoms                          | 2.0              |
| Ramachandran plot statistics <sup>c</sup>           |                  |
| Residues in most favoured regions (%)               | 96.7             |
| Residues in allowed regions (%)                     | 3.2              |
| Residues in generously allowed regions (%)          | 0.1              |
| Residues in disallowed regions (%)                  | 0.0              |

<sup>a</sup>  $\alpha$ -helical dihedral angle restraints imposed for the backbone based on the CSI.

<sup>b</sup> Calculated for an ensemble of the 20 lowest energy structures.

<sup>c</sup> Based on Procheck analysis <sup>2</sup>.

**Table S8:** Antibodies used in this work.

| <b>Name</b>                                | <b>Reference/provider</b>              | <b>Working dilution</b> | <b>Use</b>                                                                  |
|--------------------------------------------|----------------------------------------|-------------------------|-----------------------------------------------------------------------------|
| Anti-HA F7                                 | Sc-7392/ Santa Cruz                    | 1:1000                  | Sen1-HA detection in figures 1A, 1C-D, 6A                                   |
| Anti-HA 12CA5                              | 11 666 606 001/<br>Sigma               | 2.5 ug/reaction         | Sen1 colP in figure 1D                                                      |
| Anti-CBP,<br>calmodulin<br>binding protein | 07-482/ Millipore                      | 1:1000                  | Nrd-CBP detection in figure 1A,<br>Sen1-CBP detection in figure 6B          |
| Anti-Air2                                  | S. Vanacova                            | 1:1000                  | Air2 detection in figure 1A                                                 |
| Anti-Rpb1 y80                              | Santa Cruz (not<br>available any more) | 1:1000                  | Rpb1 detection in figure 6A, 6B                                             |
| Anti-phospho-<br>CTD Ser-5<br>clone 3E8    | 04-1572/ Millipore                     | 1:1000                  | Detection of S5P-CTD of RNAP<br>II in figure 6B                             |
| Anti-phospho-<br>CTD Ser-2<br>clone 3E10   | 04-1571/ Millipore                     | 1:1000                  | Detection of S2P-CTD of RNAP<br>II in figure 6B                             |
| PAP,<br>peroxidase anti-<br>peroxidase     | P1291-1ML/ Sigma                       | 1:3000                  | Used for Protein A detection on<br>TAP tag.                                 |
| Anti-Nrd1                                  | Covalab                                | 1:3000                  | Nrd1 detection in figures 1 and 6                                           |
| Anti-Nab3                                  | Covalab                                | 1:3000                  | Nab3 detection in figures 1 and<br>6                                        |
| Anti-His                                   | H1029, Sigma                           | 1:2000                  | His <sub>6</sub> -GST-Sen1 Cter and His <sub>6</sub> -<br>GST in figure 6E. |

**Table S9:** Yeast strains used in this work.

| Number  | Name                                              | Genotype                                                                        | Source                       |
|---------|---------------------------------------------------|---------------------------------------------------------------------------------|------------------------------|
| DLY17   | W303                                              | <i>ura3-1, ade2-1, his3-11,5, trp1-1, leu2-3,112, can1-100</i>                  | (Thomas and Rothstein, 1989) |
| DLY671  | BMA                                               | <i>as W303, Δtrp1</i>                                                           | F. Lacroute                  |
| DLY814  | <i>Δrrp6</i>                                      | <i>as W303, rrp6::KAN</i>                                                       | (Porrua et al., 2012)        |
| DLY1657 | <i>sen1-HA</i>                                    | <i>as BMA, Sen1::HA::KAN</i>                                                    | Tudek et al, 2014            |
| DLY2014 | <i>nrd1 ΔCID-TAP, sen1-HA</i>                     | <i>as BMA, nrd1ΔCID (Δ6-150)::TAP::HIS3</i>                                     | Tudek et al, 2014            |
| DLY2769 | <i>sen1ΔNIM</i>                                   | <i>as BMA, sen1ΔNIM (Δ2052-2063)</i>                                            | This work                    |
| DLY2982 | <i>sen1ΔNIM-HA</i>                                | <i>as BMA, sen1ΔNIM (Δ2052-2063)::HA::KAN</i>                                   | This work                    |
| DLY1737 | <i>nrd1-TAP, sen1-HA</i>                          | <i>as BMA, NRD1::TAP::HIS5 Sen1::HA::KAN</i>                                    | Tudek et al, 2014            |
| DLY2622 | <i>nrd1-TAP, sen1ΔNIM-HA</i>                      | <i>as BMA, NRD1::TAP::HIS5, sen1ΔNIM (Δ2052-2063)::HA::KAN</i>                  | This work                    |
| DLY2657 | <i>sen1ΔCter-HA</i>                               | <i>as BMA, sen1ΔCter (Δ1930-2231)::HA::KAN</i>                                  | This work                    |
| DLY2658 | <i>nrd1-TAP, sen1ΔCter-HA</i>                     | <i>as BMA, NRD1::TAP::HIS5, sen1ΔCter (Δ1930-2231)::HA::KAN</i>                 | This work                    |
| DLY2695 | <i>sen1ΔCter-HA, Δrrp6</i>                        | <i>as BMA, sen1ΔCter (Δ1930-2231)::HA::KAN, rrp6::URA</i>                       | This work                    |
| DLY2694 | <i>sen1-HA, Δrrp6</i>                             | <i>as BMA, sen1::HA::KAN, rrp6::URA</i>                                         | This work                    |
| DLY2770 | <i>sen1ΔNIM, Δrrp6</i>                            | <i>as BMA, sen1ΔNIM, rrp6::KAN</i>                                              | This work                    |
| DLY2767 | <i>Δsen1/pFL38-SEN1</i>                           | <i>as BMA, sen1::KAN, harbouring plasmid pFL38-SEN1</i>                         | This work                    |
| DLY1656 | <i>P<sub>GAL1</sub>- TAP-SEN1</i>                 | <i>as BMA, TRP1::Pgal::TAP::SEN1</i>                                            | (Porrua et al., 2012)        |
| DLY2778 | <i>P<sub>GAL1</sub>- TAP-sen1ΔNIM</i>             | <i>as BMA, TRP1::Pgal::TAP::sen1ΔNIM (Δ2052-2063)</i>                           | This work                    |
| DLY2692 | <i>P<sub>GAL1</sub>- TAP-sen1ΔNter</i>            | <i>as BMA, TRP1::Pgal::TAP::sen1ΔNter (Δ1-975)</i>                              | This work                    |
| DLY2779 | <i>P<sub>GAL1</sub>- TAP-sen1ΔNter ΔNIM</i>       | <i>as BMA, TRP1::Pgal::TAP::sen1ΔNter (Δ1-975) ΔNIM (Δ2052-2063)</i>            | This work                    |
| DLY2060 | <i>P<sub>GAL1</sub>- TAP-SEN1, Δrrp6</i>          | <i>as BMA, TRP1::Pgal::TAP::SEN1, rrp6::KAN</i>                                 | (Porrua et al., 2012)        |
| DLY2780 | <i>P<sub>GAL1</sub>- TAP-sen1ΔNIM, Δrrp6</i>      | <i>as BMA, TRP1::Pgal::TAP::sen1ΔNIM (Δ2052-2063), rrp6::KAN</i>                | This work                    |
| DLY2698 | <i>P<sub>GAL1</sub>- TAP-sen1ΔNter,Δrrp6</i>      | <i>as BMA, TRP1::Pgal::TAP::sen1ΔNter (Δ1-975), rrp6::KAN</i>                   | This work                    |
| DLY2781 | <i>P<sub>GAL1</sub>- TAP-sen1ΔNterΔNIM, Δrrp6</i> | <i>as BMA, TRP1::Pgal::TAP::sen1ΔNter (Δ1-975) ΔNIM (Δ2052-2063), rrp6::KAN</i> | This work                    |
| DLY2782 | <i>sen1-AID</i>                                   | <i>as BMA, SEN1-AID::KAN::OsTIR1</i>                                            | This work                    |

|         |                                                       |                                                                                                 |           |
|---------|-------------------------------------------------------|-------------------------------------------------------------------------------------------------|-----------|
| DLY2788 | <i>sen1-AID, Δrrp6</i>                                | as BMA, <i>SEN1-AID::KAN::OsTIR1, rrp6::URA</i>                                                 | This work |
| DLY2724 | <i>TAP-sen1/pFL38-SEN1</i>                            | as BMA, <i>TAP::SEN1</i> , harbouring plasmid <i>pFL38-SEN1</i>                                 | This work |
| DLY2725 | <i>TAP- sen1ΔNter /pFL38-SEN1</i>                     | <i>TAP::sen1ΔNter (Δ1-975)</i> , harbouring plasmid <i>pFL38-SEN1</i>                           | This work |
| DLY2726 | <i>TAP- sen1ΔNterΔNIM /pFL38-SEN1</i>                 | as BMA, <i>TAP::sen1ΔNter (Δ1-975) ΔNIM (Δ2052-2063)</i> , harbouring plasmid <i>pFL38-SEN1</i> | This work |
| DLY3152 | <i>P<sub>GAL1</sub>- TAP-SEN1, Δnrd1/ pRS316-NRD1</i> | as BMA, <i>TRP1::Pgal::TAP::SEN1, nrd1::KAN</i> ; harbouring plasmid <i>pRS316-NRD1</i>         | This work |
| DLY3187 | <i>P<sub>GAL1</sub>- TAP-SEN1, Δnab3/ pFL38-Nab3</i>  | as BMA, <i>TRP1::Pgal::TAP::SEN1, nab3::KAN</i> ; harbouring plasmid <i>pFL38-NAB3</i>          | This work |
| DLY3081 | <i>rpb3-FLAG</i>                                      | as BMA, <i>RPB3::3xFLAG::natMX6</i>                                                             | This work |
| DLY3151 | <i>rpb3-FLAG, sen1-AID</i>                            | as BMA, <i>SEN1-AID:KAN::OsTIR1, RPB3::3xFLAG::natMX6</i>                                       | This work |

**Table S10:** plasmids used in this work.

| Name             | Description                                                                                                                                                              | Source                      |
|------------------|--------------------------------------------------------------------------------------------------------------------------------------------------------------------------|-----------------------------|
| pBS1761          | Ap <sup>r</sup> ; <i>oriColE1</i> ; plasmid bearing cassette for N-terminal tagging with PGAL1-TAP                                                                       | (Finoux and Séraphin, 2006) |
| pDL708 (pU6H3HA) | Ap <sup>r</sup> ; <i>oriColE1</i> ; plasmid bearing cassette for C-terminal tagging with HA                                                                              | (Finoux and Séraphin, 2006) |
| pDL772           | Ap <sup>r</sup> ; <i>oriColE1</i> ; derivative of pFL38 (URA) bearing yeast <i>SEN1</i>                                                                                  | F. Lacroute                 |
| pDL693           | Ap <sup>r</sup> ; <i>oriColE1</i> ; derivative of pFL39 bearing yeast <i>SEN1</i>                                                                                        | F. Lacroute                 |
| pDL703           | Ap <sup>r</sup> ; <i>oriColE1</i> ; derivative of pFL39 bearing <i>sen1ΔNIM</i>                                                                                          | This work                   |
| pETM30           | Kan <sup>r</sup> ; <i>oriColE1</i> ; vector for overexpression of proteins from the T7 promoter                                                                          | R. Stefl                    |
| pDL834           | Ap <sup>r</sup> ; <i>oriColE1</i> ; derivative of pFL39 bearing <i>sen1ΔNter</i>                                                                                         | This work                   |
| pDL835           | Ap <sup>r</sup> ; <i>oriColE1</i> ; derivative of pFL39 bearing <i>sen1ΔNterΔNIM</i>                                                                                     | This work                   |
| pDL846           | Kan <sup>r</sup> ; <i>oriColE1</i> ; derivative of pETM30 carrying the C-terminal domain of Sen1 (aa 1931-2231) under the control of the T7 promoter                     | This work                   |
| pDL848           | Kan <sup>r</sup> ; <i>oriColE1</i> ; derivative of pETM30 carrying the ΔNIM version of the C-terminal domain of Sen1 (aa 1931-2231) under the control of the T7 promoter | This work                   |
| pDL856           | Ap <sup>r</sup> ; <i>oriColE1</i> ; derivative of pFL39 bearing yeast <i>sen1-HA</i>                                                                                     | This work                   |
| pDL858           | Ap <sup>r</sup> ; <i>oriColE1</i> ; derivative of pFL39 bearing <i>sen1ΔNIM-HA</i>                                                                                       | This work                   |
| pDL857           | Ap <sup>r</sup> ; <i>oriColE1</i> ; derivative of pFL39 bearing <i>sen1ΔNter-HA</i>                                                                                      | This work                   |
| pDL859           | Ap <sup>r</sup> ; <i>oriColE1</i> ; derivative of pFL39 bearing <i>sen1ΔNterΔNIM-HA</i>                                                                                  | This work                   |
| pDL876           | Ap <sup>r</sup> ; <i>oriColE1</i> ; derivative of pFL39 bearing the chimeric <i>nrd1CID</i> (aa 1-153) - <i>sen1ΔNter</i>                                                | This work                   |
| pDL877           | Ap <sup>r</sup> ; <i>oriColE1</i> ; derivative of pFL39 bearing the chimeric <i>nrd1CID</i> (aa 1-153) - <i>sen1ΔNterΔNIM</i>                                            | This work                   |
| pRS_NC           | Ap <sup>r</sup> ; <i>oriColE1</i> ; plasmid bearing CID-His6 under the control of the T7 promoter                                                                        | (Kubicek et al., 2012)      |
| pRS_NC_L20D      | Kan <sup>r</sup> ; <i>oriColE1</i> ; plasmid bearing CID(L20D)-His6 under the control of the T7 promoter                                                                 | (Vasiljeva et al., 2008)    |
| pRS_NC_K21D      | Kan <sup>r</sup> ; <i>oriColE1</i> ; plasmid bearing CID(K21D)-His6 under the control of the T7 promoter                                                                 | (Vasiljeva et al., 2008)    |
| pRS_NC_S25R      | Ap <sup>r</sup> ; <i>oriColE1</i> ; plasmid bearing CID(S25R)-His6 under the control of the T7 promoter                                                                  | (Kubicek et al., 2012)      |
| pRS_NC_R28D      | Ap <sup>r</sup> ; <i>oriColE1</i> ; plasmid bearing CID(R28D)-His6 under the control of the T7 promoter                                                                  | (Kubicek et al., 2012)      |
| pRS_NC_I130A     | Ap <sup>r</sup> ; <i>oriColE1</i> ; plasmid bearing CID(I130A)-His6 under the control of the T7 promoter                                                                 | (Tudek et al., 2014)        |
| pRS_NC_I130K     | Ap <sup>r</sup> ; <i>oriColE1</i> ; plasmid bearing CID(I130K)-His6 under the control of the T7 promoter                                                                 | (Tudek et al., 2014)        |
| pRS_NC_I130N     | Ap <sup>r</sup> ; <i>oriColE1</i> ; plasmid bearing CID(I130N)-His6 under the control of the T7 promoter                                                                 | (Tudek et al., 2014)        |
| pRS_NC_R133A     | Ap <sup>r</sup> ; <i>oriColE1</i> ; plasmid bearing CID(R133A)-His6 under the control of the T7 promoter                                                                 | (Tudek et al., 2014)        |
| pRS_NC_R133G     | Ap <sup>r</sup> ; <i>oriColE1</i> ; plasmid bearing CID(R133G)-His6 under the control of the T7 promoter                                                                 | This work                   |
| pRS_NC_R133D     | Ap <sup>r</sup> ; <i>oriColE1</i> ; plasmid bearing CID(R133D)-His6 under the control of the T7 promoter                                                                 | This work                   |



**Table S11: List of oligonucleotides used in this work.**

| <b>Name</b> | <b>Sequence (5'-3')</b>                              | <b>Information/use</b>                                                                       |
|-------------|------------------------------------------------------|----------------------------------------------------------------------------------------------|
| DL1119      | AAGTGACGAAGTTCATGCTA                                 | Forward oligo to generate by PCR a probe to detect snR13 read-through region.                |
| DL1367      | GGCCCAACAGTATATTCATATCC                              | Reverse oligo to generate by PCR a probe to detect snR13 read-through region.                |
| DL474       | GCAAAGATCTGTATGAAAGG                                 | Forward oligo to generate by PCR a probe to detect NEL025C.                                  |
| DL480       | ATCTGACCAGGTCAAGCTAC                                 | Reverse oligo to generate by PCR a probe to detect NEL025C.                                  |
| DL2505      | GTGTGTGGACAATCGATTTGC                                | Forward oligo to generate by PCR a probe to detect snR33 3'precursor and read-through region |
| DL2506      | GCATTGGCTCGATTGTCAAC                                 | Reverse oligo to generate by PCR a probe to detect snR33 3'precursor and read-through region |
| DL4178      | GCGTGATACTGACCGATACC                                 | Forward oligo to generate by PCR a probe to detect snR82 3'precursor and read-through region |
| DL4179      | TTGCCTTGCTATTATGTGTCC                                | Reverse oligo to generate by PCR a probe to detect snR82 3'precursor and read-through region |
| DL4278      | GCTTCATACGAACGGCTCA                                  | Forward oligo to generate by PCR a probe to detect YDR379C-A and CUT526 read-through.        |
| DL4279      | AGGGTGTGAAAAGGTGGCAA                                 | Reverse oligo to generate by PCR a probe to detect YDR379C-A and CUT526 read-through.        |
| DL1154      | CCTATAACAACAACAACATG                                 | Forward oligo to generate by PCR a probe to detect snR47 RNA.                                |
| DL1157      | ATAGCCATTAGTAAGTACGC                                 | Reverse oligo to generate by PCR a probe to detect snR47 RNA.                                |
| DL2627      | ATTCAAAAGCGAACACCGAATTGAC<br>CATGAGGAGACGGTCTGGTTTAT | Reverse oligo used as oligo probe to detect U4 snRNA                                         |

### Supplementary references:

1. Waterhouse, A. M., Procter, J. B., Martin, D. M. A., Clamp, M. & Barton, G. J. Jalview Version 2--a multiple sequence alignment editor and analysis workbench. *Bioinformatics* **25**, 1189–1191 (2009).
2. Laskowski, R. A., Rullmann, J. A., MacArthur, M. W., Kaptein, R. & Thornton, J. M. AQUA and PROCHECK-NMR: programs for checking the quality of protein structures solved by NMR. *J. Biomol. NMR* **8**, 477–486 (1996).
3. Thomas, B. J. & Rothstein, R. The genetic control of direct-repeat recombination in *Saccharomyces*: the effect of *rad52* and *rad1* on mitotic recombination at *GAL10*, a transcriptionally regulated gene. *Genetics* **123**, 725–738 (1989).
4. Finoux, A.-L. & Séraphin, B. In vivo targeting of the yeast Pop2 deadenylase subunit to reporter transcripts induces their rapid degradation and generates new decay intermediates. *J. Biol. Chem.* **281**, 25940–25947 (2006).
